# Supplementary material for: Water soluble and fluorescent copolymers as highly sensitive and selective fluorescent chemosensors for the detection of cyanide anions in biological media
Source: Royal Society of Chemistry journal article supplement (doi:10.1039/c3ra43497d), 2013-01-01
Supplement: c3ra43497d.pdf [file c3ra43497d.pdf]

*Supporting information for:*

**Water soluble and fluorescent Copolymer for Highly Sensitive  
and Selective fluorescent Chemosensor for Cyanide Anion  
Detection in biological medium**

**Jalal Isaad,<sup>\*1,2</sup> Fouad Malek<sup>3</sup> and Ahmida El Acharia<sup>1,2</sup>**

<sup>1</sup> University Lille Nord de France, F-5900 Lille, France

<sup>2</sup> ENSAIT, GEMTEX, F-59056 Roubaix, France

<sup>3</sup> Faculté des Sciences, Université Mohamed Premier, Laboratoire de Chimie Organique,  
Macromoléculaire et Produits Naturels-URAC 25, Bd Mohamed VI, BP: 717,

60 000. Oujda, Morocco

Tel: (+33) 0320258936

E-mail: [jalal.isaad@ensait.fr](mailto:jalal.isaad@ensait.fr)

Table of contents

|    |                                      |    |
|----|--------------------------------------|----|
| 1. | Determination of the detection limit | S2 |
| 2. | References                           | S3 |

## 1 Determination of the detection limit<sup>1</sup>

The detection limit DL of chemosensor **5** was determined from the following equation:

$$DL = K \times Sb_1 / S$$

Where

$K = 3$ ;

$Sb_1$  is the standard deviation of the blank solution;

$S$  is the slope of the calibration curve.

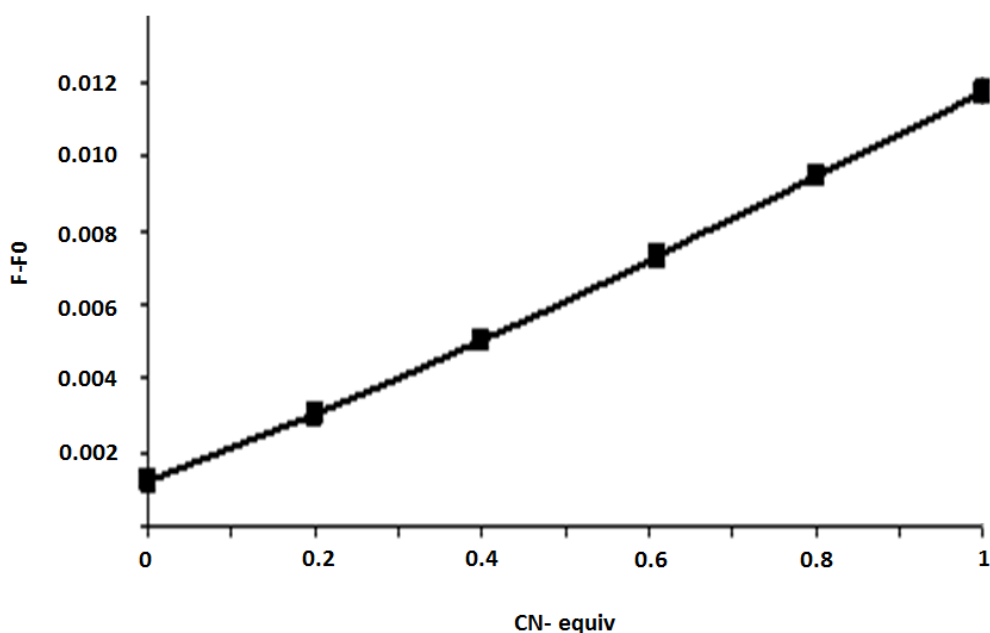

**Figure S<sub>1</sub>:** Calibration curve of **P2-CN-** in HEPES (pH=7.4). The excitation wavelength was 460 nm. The concentration of the chemosensor was 50  $\mu$ M.

$$Y = A + B \times X$$

| Parameter | Value   | Error     |
|-----------|---------|-----------|
| A =       | 0.0011  | 0.000233  |
| B         | 2811.23 | 101.23657 |
| R         | 0.99374 |           |

$$DL = 1.17 \mu\text{M}$$

## 2. References

- 1 M. Zhu, M. Yuan, X. Liu, J. Xu, J. Lv, C. Huang, H. Liu, Y. Li, S. Wang and D. Zhu, *Org. Lett.*, **2008**, 10, 1481.
